# Supplementary material
Source: PubMed Central journal article supplement (PMC3372931)

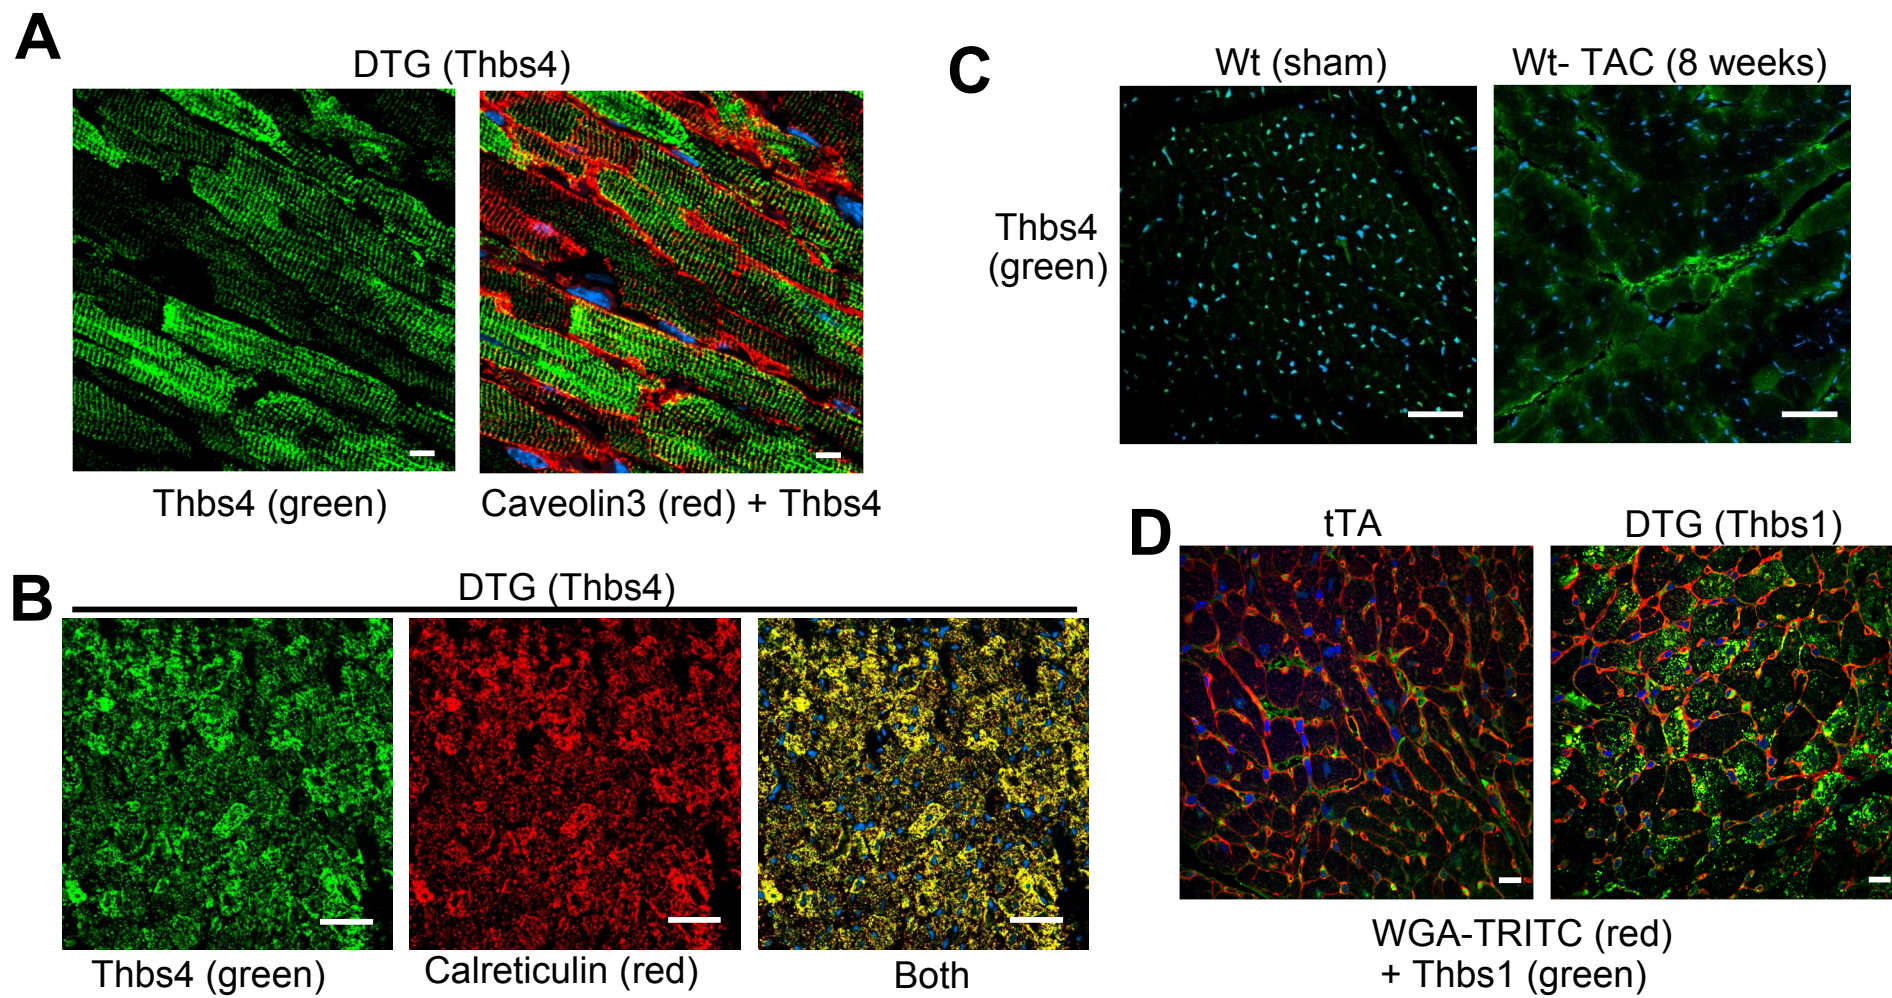

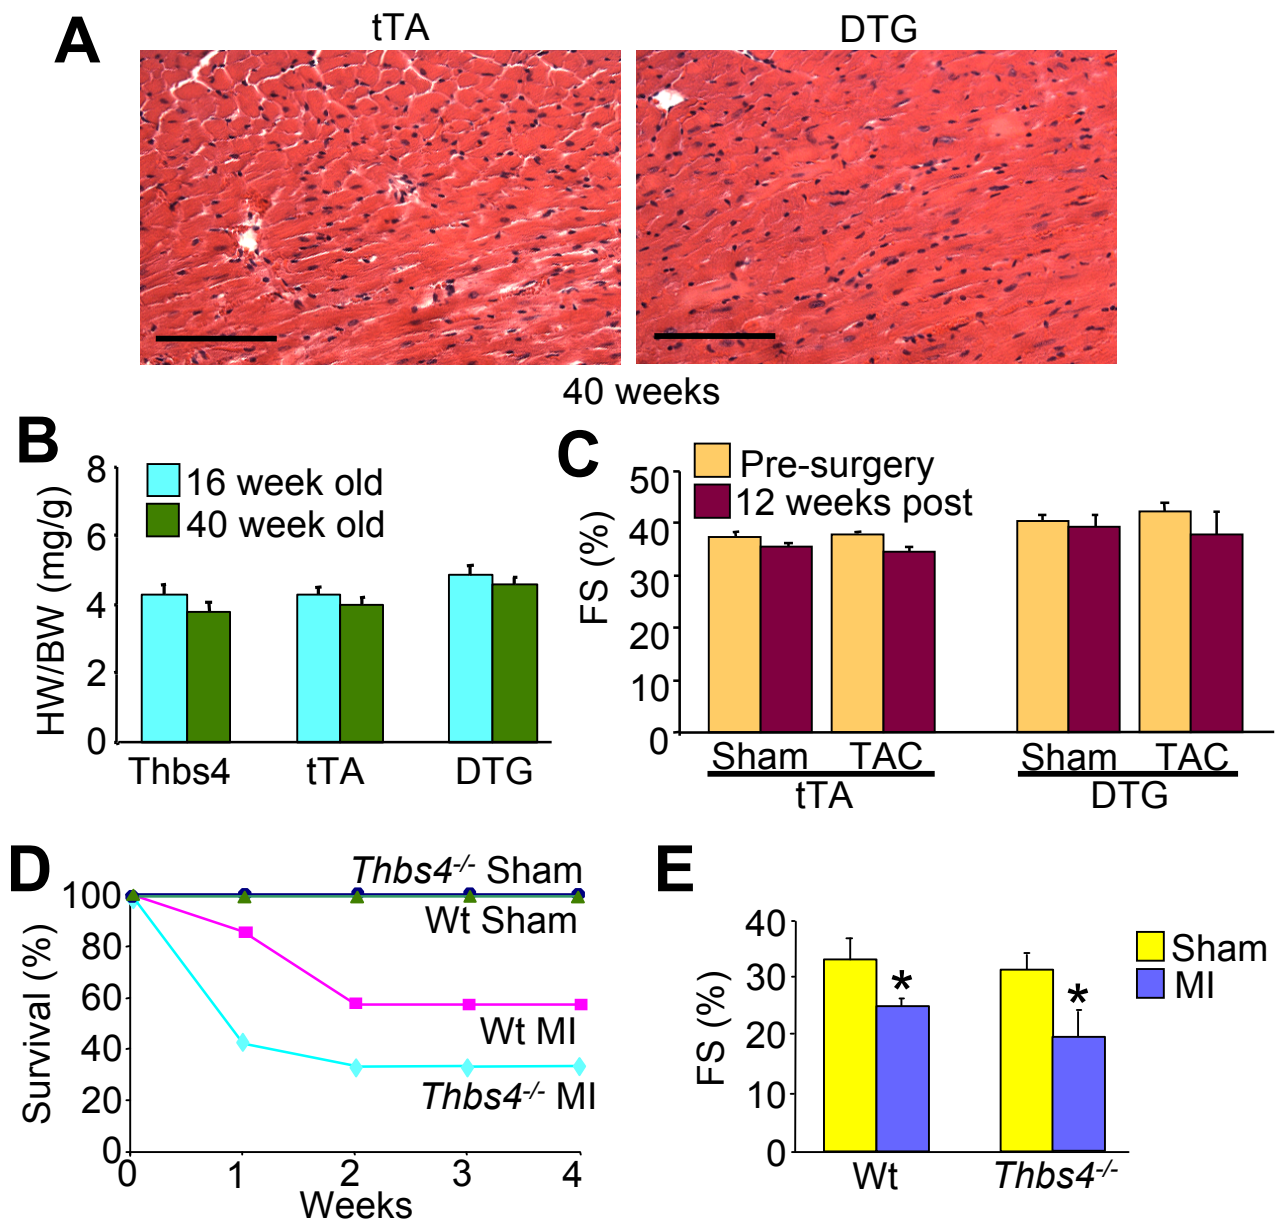



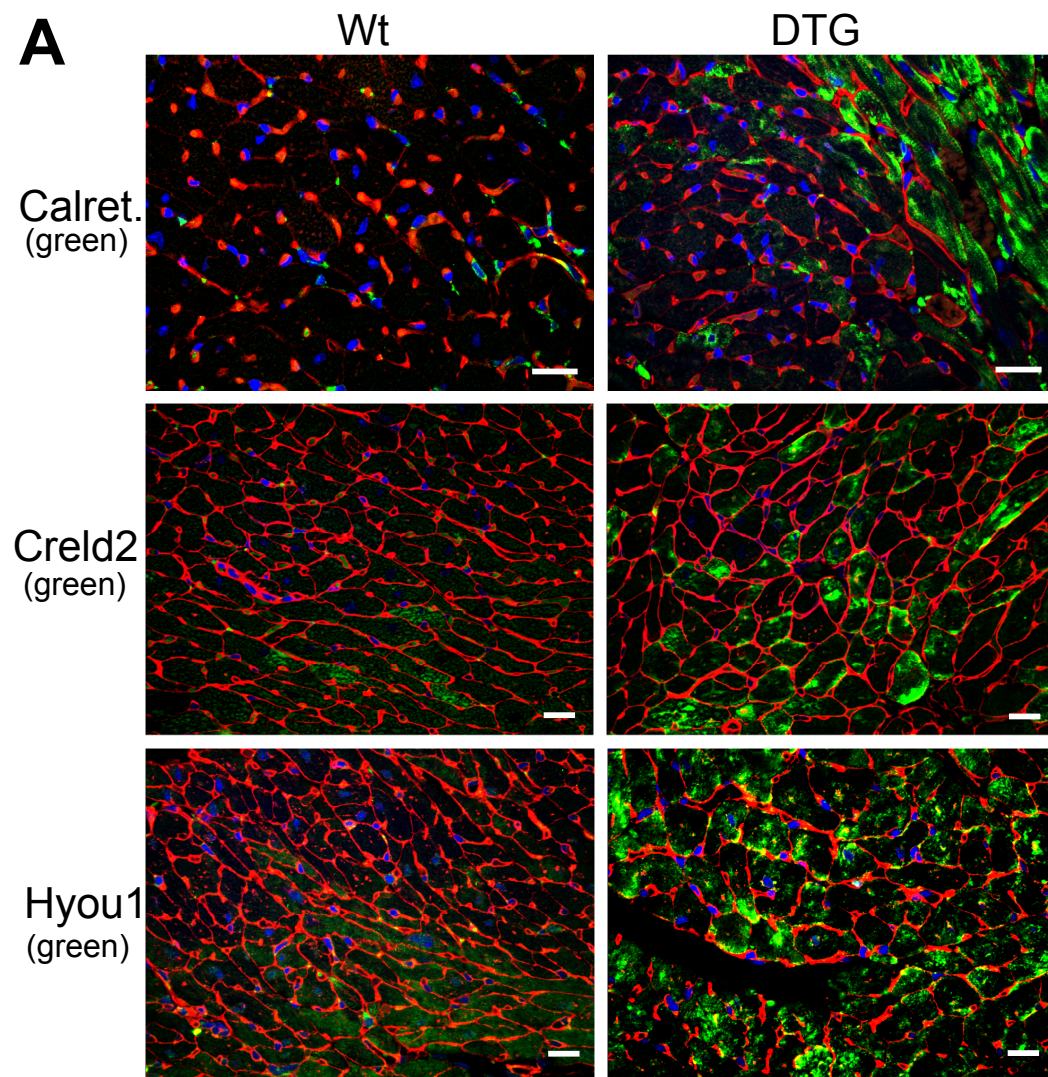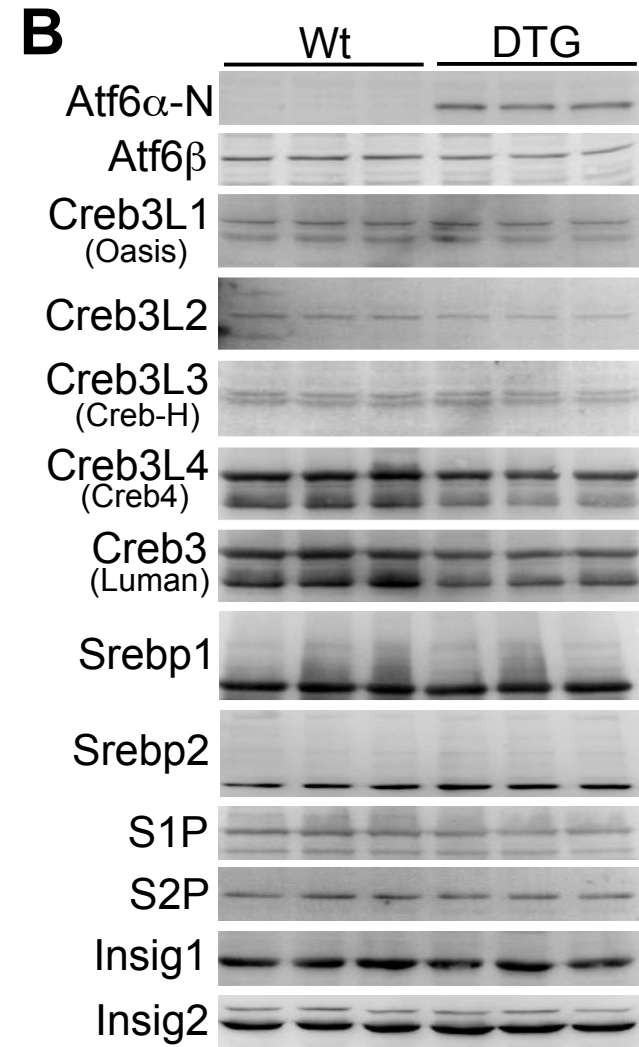

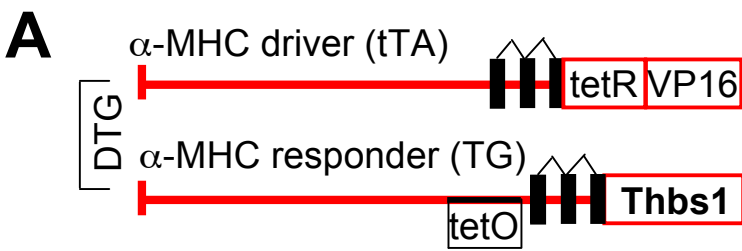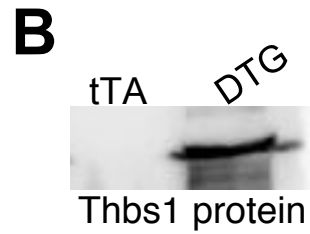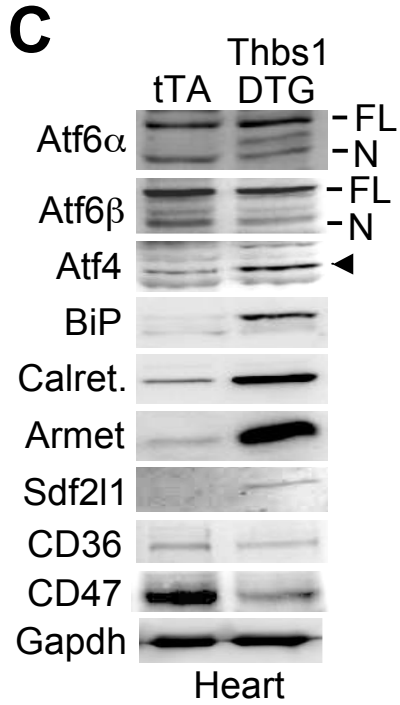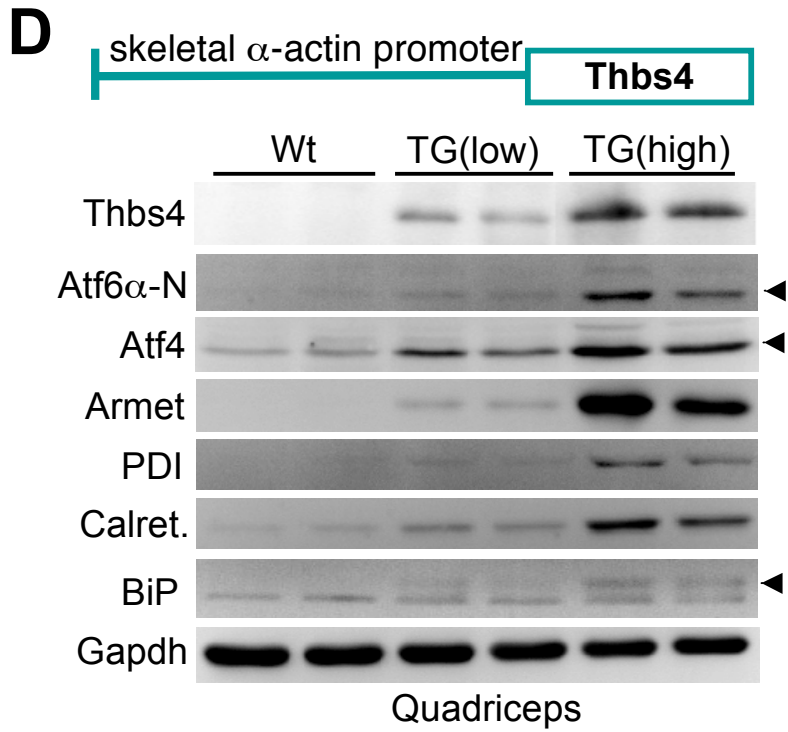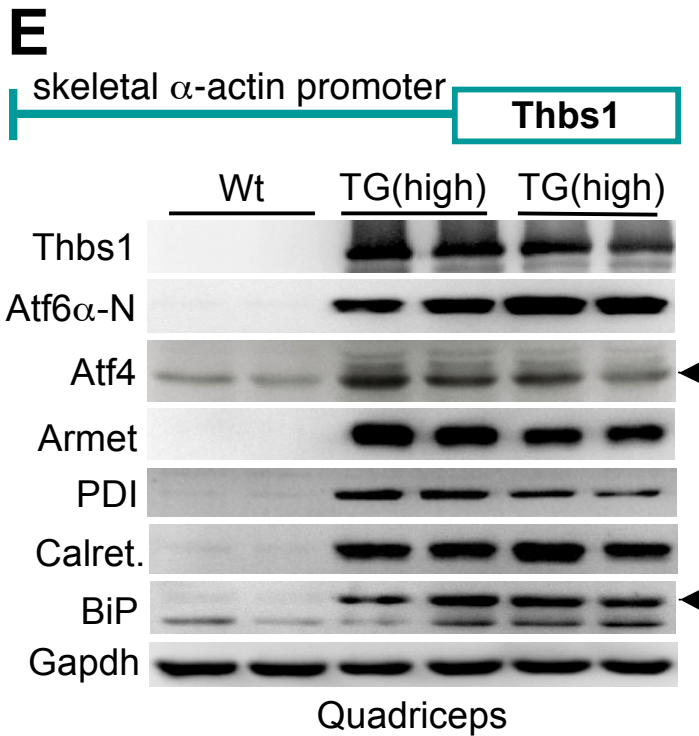



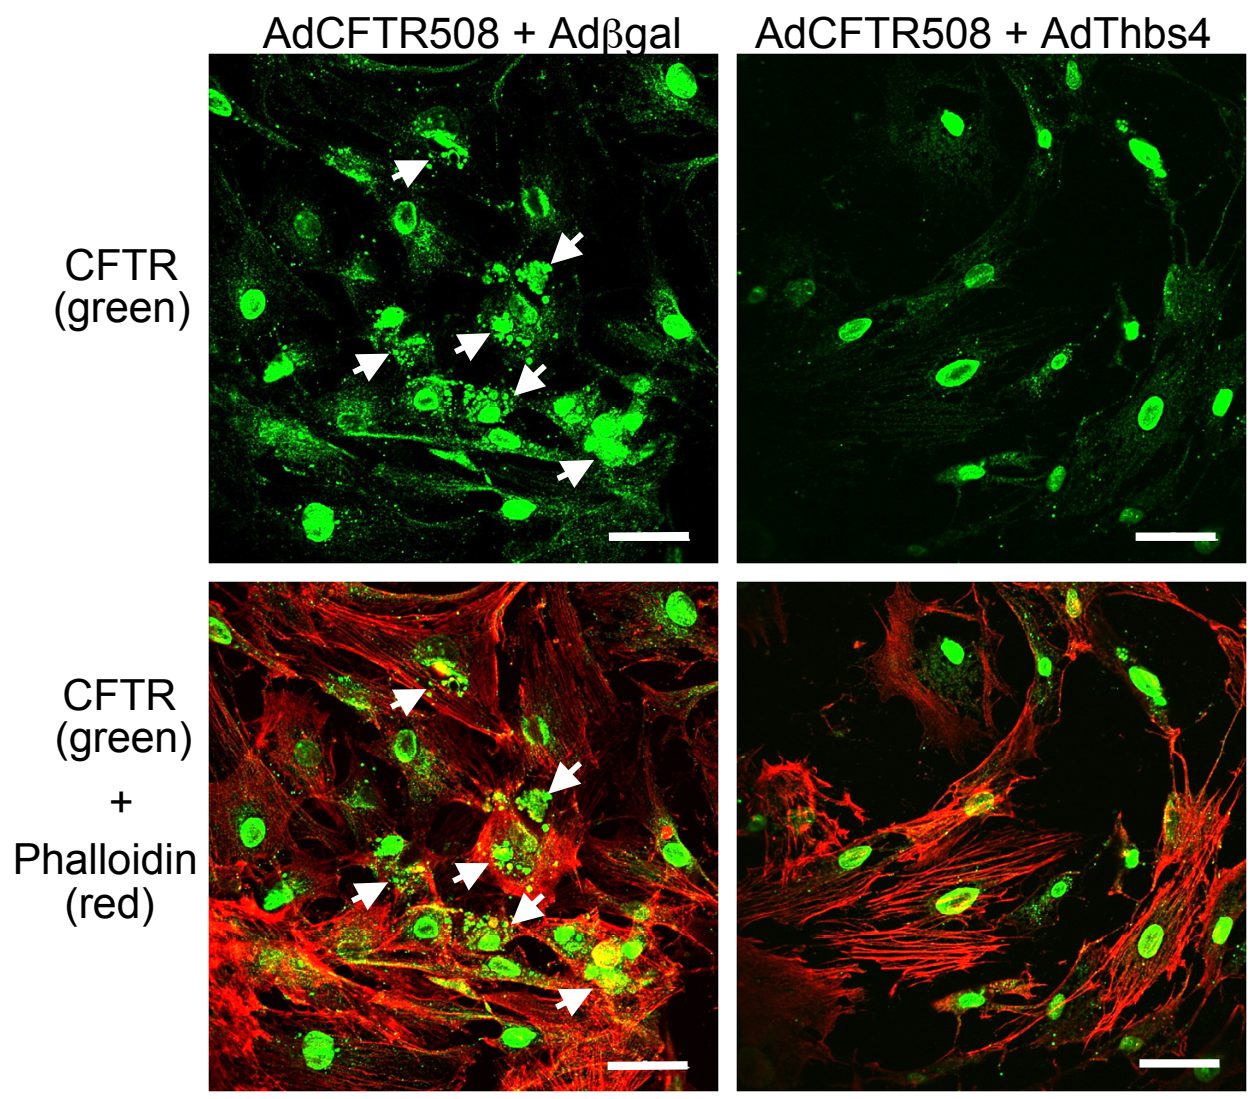

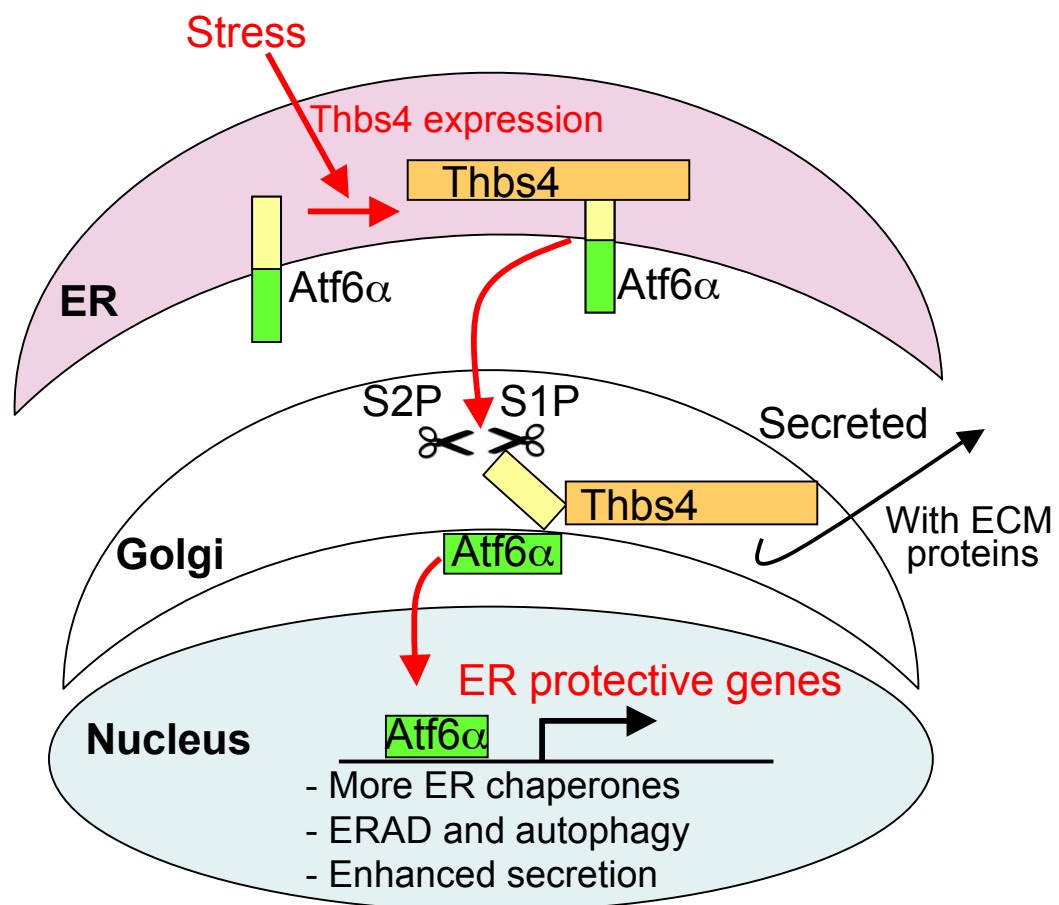

Supplement: NIHMS376504-supplement-02.pdf [file NIHMS376504-supplement-02.pdf]
